# Supplementary material
Source: PubMed Central journal article supplement (PMC4034214)
Supplement: 1322275111_pnas.201322275SI.pdf [file 1322275111_pnas.201322275SI.pdf]

# Supporting Information

Sjölund et al. 10.1073/pnas.1322275111

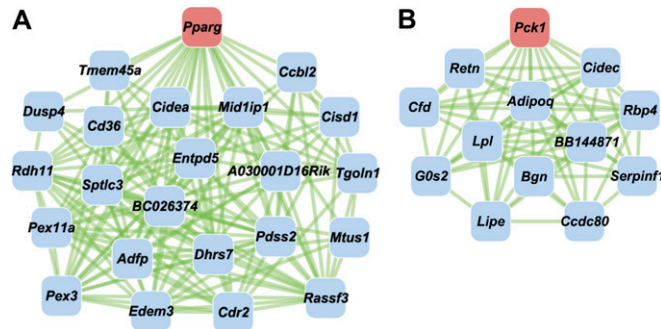

**Fig. S1.** Skin gene networks of *Pparg* and *Pck1*. (A) Peroxisome proliferative activated receptor gamma, coactivator 1 alpha (*Pparg*) (red) correlation subnetwork ( $\rho > \pm 0.70$ ) in *Mus spretus*/*Mus musculus* backcross mice (FVBBX) epidermis. (B) *Pck1* (red) correlation subnetwork ( $\rho \geq \pm 0.65$ ) in FVBBX epidermis.

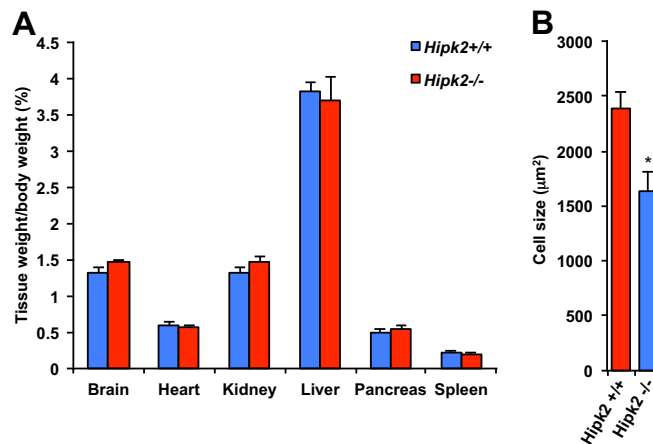

**Fig. S2.** (A) Weights of the brain, heart, kidney, liver, pancreas, and spleen remain essentially unchanged in *homeodomain-interacting protein kinase 2* (*Hipk2*) knockout mice compared with *Hipk2* wild-type mice. Weights of the indicated tissues from 8-wk-old female *Hipk2*<sup>+/+</sup> ( $n = 8$ ) and *Hipk2*<sup>-/-</sup> ( $n = 8$ ) mice after normalization to body weight. Data are presented as mean  $\pm$  SEM. (B) Adipocyte cell size is significantly reduced in *Hipk2* knockout mice compared with *Hipk2* wild-type mice. Adipocyte size of ovarian white adipose tissue from 8- to 10-wk-old female *Hipk2*<sup>+/+</sup> ( $n = 4$ ) and *Hipk2*<sup>-/-</sup> mice ( $n = 4$ ). \* $P < 0.05$  for *Hipk2*<sup>+/+</sup> versus *Hipk2*<sup>-/-</sup> mice. Data are presented as mean  $\pm$  SEM.



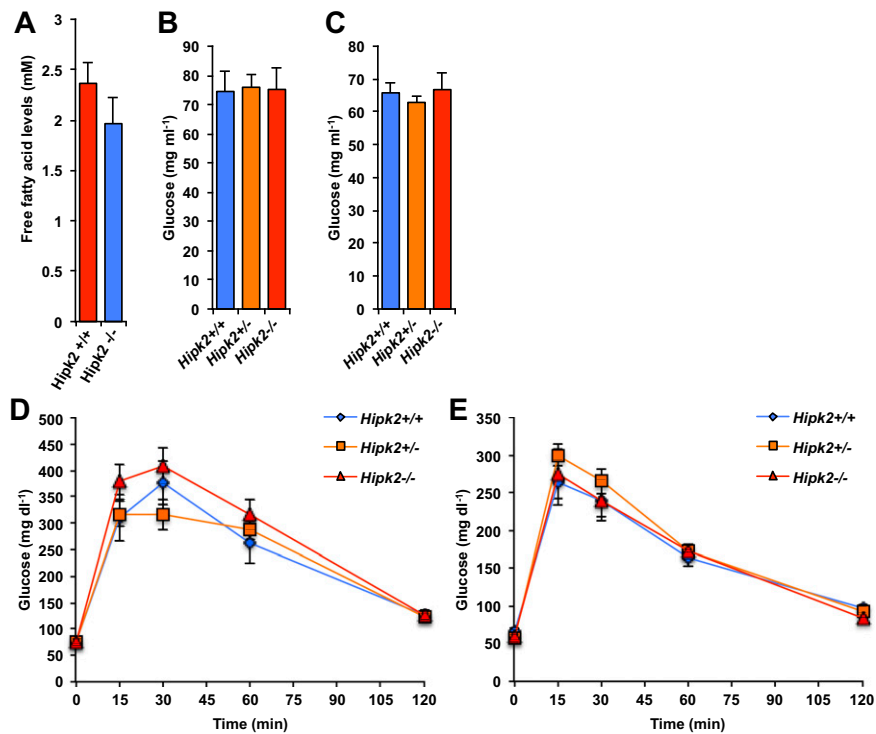

**Fig. S5.** Free fatty acid levels, glucose levels, and glucose clearance in *Hipk2*-null mice are comparable to wild-type littermates. (A) Free fatty acid concentrations were determined in fasted (6 h) female *Hipk2*<sup>+/+</sup> ( $n = 3$ ) and *Hipk2*<sup>-/-</sup> ( $n = 6$ ) mice. (B and C) Blood glucose levels of male (B) and female (C) *Hipk2*<sup>+/+</sup>, *Hipk2*<sup>+/-</sup>, and *Hipk2*<sup>-/-</sup> mice ( $n = 7-14$ , *Hipk2*<sup>+/+</sup>;  $n = 14-16$ , *Hipk2*<sup>+/-</sup>;  $n = 7-10$ , *Hipk2*<sup>-/-</sup>). (D and E) Glucose tolerance tests on male (D) and female (E) *Hipk2*<sup>+/+</sup>, *Hipk2*<sup>+/-</sup>, and *Hipk2*<sup>-/-</sup> mice ( $n = 6-14$ , *Hipk2*<sup>+/+</sup>;  $n = 17$ , *Hipk2*<sup>+/-</sup>;  $n = 6-8$ , *Hipk2*<sup>-/-</sup>). Data are presented as mean  $\pm$  SEM.

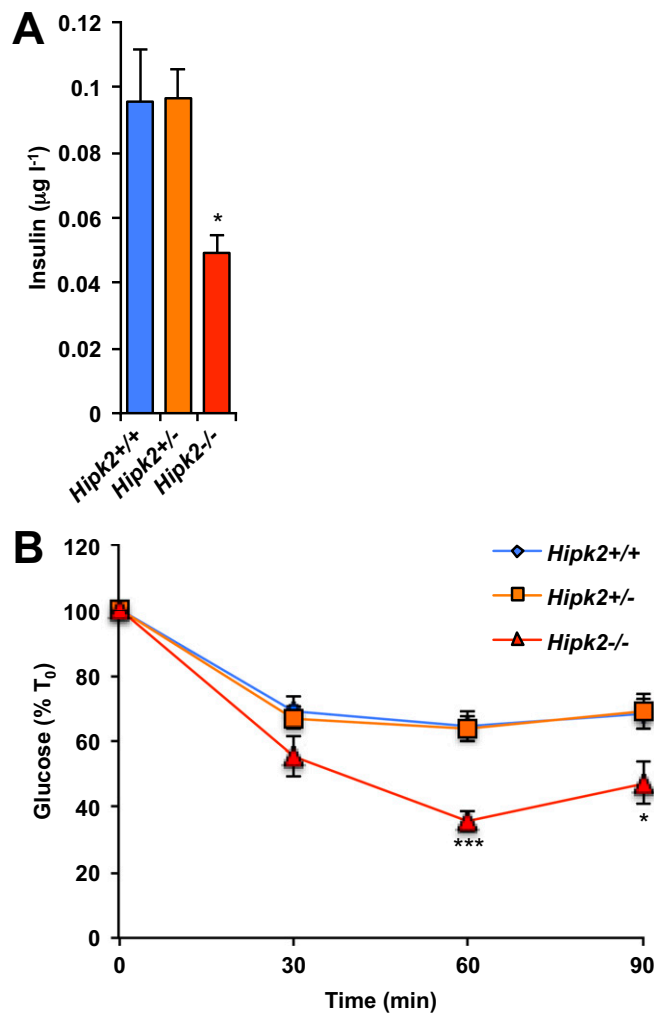

Fig. S6. Loss of *Hipk2* reduces basal insulin levels and increases insulin sensitivity. (A) Plasma insulin levels of 8- to 10-wk-old male *Hipk2*<sup>+/+</sup>, *Hipk2*<sup>+/-</sup>, and *Hipk2*<sup>-/-</sup> mice (n = 7, *Hipk2*<sup>+/+</sup>; n = 14, *Hipk2*<sup>+/-</sup>; n = 7, *Hipk2*<sup>-/-</sup>). (B) Insulin tolerance tests on 8- to 10-wk-old male *Hipk2*<sup>+/+</sup>, *Hipk2*<sup>+/-</sup>, and *Hipk2*<sup>-/-</sup> mice (n = 6, *Hipk2*<sup>+/+</sup>; n = 17, *Hipk2*<sup>+/-</sup>; n = 6, *Hipk2*<sup>-/-</sup>). T<sub>0</sub>, time zero (start of the experiment, i.e., the basal level when insulin was injected). \*P < 0.05 and \*\*\*P < 0.001 for *Hipk2*<sup>+/+</sup> versus *Hipk2*<sup>+/-</sup> or *Hipk2*<sup>-/-</sup> mice. Data are presented as mean ± SEM.

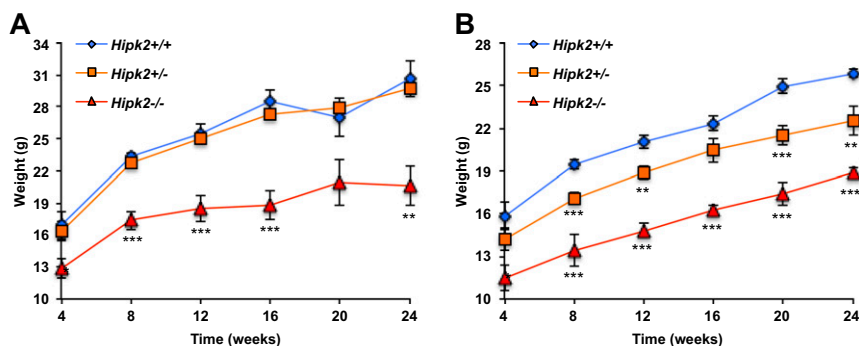

Fig. S7. *Hipk2* knockout mice weigh less than control group littermates. Body weights of male (A) and female (B) *Hipk2*<sup>+/+</sup>, *Hipk2*<sup>+/-</sup>, and *Hipk2*<sup>-/-</sup> mice (n = 12–26, *Hipk2*<sup>+/+</sup>; n = 8–30, *Hipk2*<sup>+/-</sup>; n = 6–17, *Hipk2*<sup>-/-</sup>). \*P < 0.05, \*\*P < 0.01, and \*\*\*P < 0.001 for *Hipk2*<sup>+/+</sup> versus *Hipk2*<sup>+/-</sup> or *Hipk2*<sup>-/-</sup> mice. Data are presented as mean ± SEM.

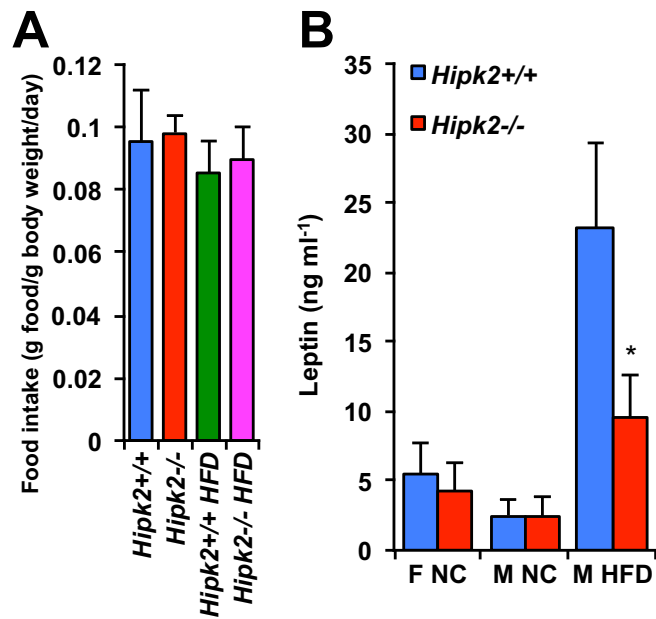

**Fig. S8.** (A) Food intake is indistinguishable between *Hipk2*-null mice and *Hipk2* wild-type mice. Daily food intake normalized to body weight of *Hipk2*<sup>+/+</sup> ( $n = 7$ ) and *Hipk2*<sup>-/-</sup> ( $n = 7$ ) mice on normal chow or a high-fat diet (HFD). Data are presented as mean  $\pm$  SEM. (B) There are significantly lower circulating levels of leptin in male *Hipk2*-null mice compared with *Hipk2* WT mice on a high-fat diet. Plasma leptin levels in normal chow-fed (NC) female (F) and male (M) mice or HFD-fed male mice ( $n = 4-8$ ). \* $P < 0.05$  for *Hipk2*<sup>+/+</sup> versus *Hipk2*<sup>-/-</sup> mice. Data are presented as mean  $\pm$  SEM.

**Table S1. Hipk2 correlations to adipocyte-associated genes are more pronounced in female mice**

| Top 40 Hipk2 correlations in female FVBBX mice | rho  | Top 40 Hipk2 correlations in male FVBBX mice | rho  |
|------------------------------------------------|------|----------------------------------------------|------|
| <b>Scd1</b>                                    | 0.81 | <i>Hoxd10</i>                                | 0.76 |
| <i>Rassf3</i>                                  | 0.80 | <i>Gse1</i>                                  | 0.76 |
| <i>A030001D16Rik</i>                           | 0.80 | <i>Rab3ip</i>                                | 0.76 |
| <b>Fa2h</b>                                    | 0.80 | <i>Tpm1</i>                                  | 0.76 |
| <b>Ptplb</b>                                   | 0.79 | <i>Palld</i>                                 | 0.76 |
| <b>Mid1ip1</b>                                 | 0.79 | <b>Elovl4</b>                                | 0.75 |
| <i>Pank1</i>                                   | 0.77 | <i>Tmem62</i>                                | 0.75 |
| <b>Mgll</b>                                    | 0.77 | <b>Far2</b>                                  | 0.74 |
| <i>3110001I20Rik</i>                           | 0.77 | <i>Al646023</i>                              | 0.74 |
| <b>Crat</b>                                    | 0.76 | <i>Tmem139</i>                               | 0.73 |
| <b>Dhcr24</b>                                  | 0.76 | <i>Pdzrn3</i>                                | 0.73 |
| <b>Soat1</b>                                   | 0.76 | <i>D630004K10Rik</i>                         | 0.73 |
| <i>2610019F03Rik</i>                           | 0.76 | <i>Col4a5</i>                                | 0.73 |
| <b>Far2</b>                                    | 0.75 | <i>Mark1</i>                                 | 0.72 |
| <i>Pxmp4</i>                                   | 0.75 | <i>Enc1</i>                                  | 0.72 |
| <i>Gnmt</i>                                    | 0.75 | <i>Rassf3</i>                                | 0.71 |
| <b>Hsd3b2</b>                                  | 0.74 | <i>Gpr125</i>                                | 0.71 |
| <b>Pdss2</b>                                   | 0.73 | <i>Lbh</i>                                   | 0.71 |
| <i>Dock3</i>                                   | 0.73 | <i>E430014L09Rik</i>                         | 0.71 |
| <i>Mgst1</i>                                   | 0.73 | <i>Frm4a</i>                                 | 0.71 |
| <b>Acot1</b>                                   | 0.73 | <i>Sardh</i>                                 | 0.71 |
| <i>Arl6ip2</i>                                 | 0.73 | <i>Cpe</i>                                   | 0.70 |
| <i>2310001A20Rik</i>                           | 0.73 | <i>Nfe2l3</i>                                | 0.70 |
| <i>Edem3</i>                                   | 0.72 | <i>Gli1</i>                                  | 0.70 |
| <b>Pparg</b>                                   | 0.72 | <i>Marcks1</i>                               | 0.70 |
| <i>2010305C02Rik</i>                           | 0.72 | <i>Nrp2</i>                                  | 0.70 |
| <i>Brp44</i>                                   | 0.72 | <i>1200009O22Rik</i>                         | 0.69 |
| <b>Leng4</b>                                   | 0.72 | <i>Krtap3-3</i>                              | 0.69 |
| <i>Zcd1</i>                                    | 0.72 | <i>Slc39a10</i>                              | 0.69 |
| <b>Slc27a1</b>                                 | 0.72 | <i>Pcp4</i>                                  | 0.69 |
| <i>Hoxb2</i>                                   | 0.71 | <b>Acsm3</b>                                 | 0.69 |
| <b>Elovl4</b>                                  | 0.71 | <i>BC024479</i>                              | 0.69 |
| <i>1200015F23Rik</i>                           | 0.71 | <i>Odz3</i>                                  | 0.68 |
| <b>Cat</b>                                     | 0.71 | <i>Sh3d19</i>                                | 0.68 |
| <b>Pnpla5</b>                                  | 0.71 | <i>Echdc1</i>                                | 0.68 |
| <i>Tmem164</i>                                 | 0.71 | <i>2610019P18Rik</i>                         | 0.68 |
| <b>Acsm3</b>                                   | 0.71 | <i>9130213B05Rik</i>                         | 0.68 |
| <i>Panx3</i>                                   | 0.71 | <i>Scrg1</i>                                 | 0.68 |
| <i>Ccbl2</i>                                   | 0.71 | <i>Pitrm1</i>                                | 0.67 |
| <i>Ppa1</i>                                    | 0.71 | <i>Hnrpa2b1</i>                              | 0.67 |

Hipk2 correlations in epidermis from female ( $n = 40$ ) and male ( $n = 31$ ) FVBBX mice. Genes in bold are directly annotated to the Gene Ontology (GO) term "lipid metabolic process" (GO ID code 0006629).

**Table S2. TaqMan probes used for quantitative PCR analysis**

| Gene            | TaqMan probe  |
|-----------------|---------------|
| <i>Adfp</i>     | Mm00475794_m1 |
| <i>Adipoq</i>   | Mm00456425_m1 |
| <i>Cebpa</i>    | Mm00514283_s1 |
| <i>Cebpb</i>    | Mm00843434_s1 |
| <i>CD36</i>     | Mm01135198_m1 |
| <i>Cfd</i>      | Mm01143935_g1 |
| <i>Cidea</i>    | Mm00432554_m1 |
| <i>Fabp4</i>    | Mm00445878_m1 |
| <i>Fa2h</i>     | Mm00626259_m1 |
| <i>Hipk2</i>    | Mm00439329_m1 |
| <i>Mest</i>     | Mm00484993_m1 |
| <i>Lipe</i>     | Mm00495359_m1 |
| <i>Pank1</i>    | Mm00458408_m1 |
| <i>Pck1</i>     | Mm01247058_m1 |
| <i>Pparg1/2</i> | Mm00440945_m1 |
| <i>Pparg2</i>   | Mm00440940_m1 |
| <i>Ppargc1a</i> | Mm01208835_m1 |
| <i>Rbp4</i>     | Mm00803264_g1 |
| <i>Scd1</i>     | Mm00772290_m1 |
| <i>Ucp1</i>     | Mm0494069_m1  |
